# Supplementary material for: Metformin alleviates hepatic iron overload and ferroptosis through AMPK-ferroportin pathway in HFD-induced NAFLD
Source: PubMed Central journal article supplement — iScience. 2023 Nov 22;26(12):108560. doi: 10.1016/j.isci.2023.108560 (PMC10711470; doi:10.1016/j.isci.2023.108560), 2023-11-22
Supplement: mmc1.pdf [file mmc1.pdf]

iScience, Volume 26

## **Supplemental information**

### **Metformin alleviates hepatic iron overload and ferroptosis through AMPK-ferroportin pathway in HFD-induced NAFLD**

**Fangzhi Yue, Ying Shi, Shanyu Wu, Lin Xing, Dan He, Lin Wei, Anqi Qiu, Ryan Russell, and Dongmei Zhang**

## Supplemental information

Table S1. qPCR primers for mRNA validation (Related to STAR★METHODS)

| Genes        | Primer Sequence 5' to 3'    |
|--------------|-----------------------------|
| GPX4-qPCR-F  | GAC ATC GAC GGG CAC AT      |
| GPX4-qPCR-R  | ATC CGC AAA CCA CAC TCA     |
| FPN-qPCR-F   | CTC TGT CAG CCT GCT GTT TG  |
| FPN-qPCR-R   | TCA GGA TTT GGG GCC AAG ATG |
| GAPDH-qPCR-F | ACG GAT TTG GTC GTA TTGG    |
| GAPDH-qPCR-R | TCC CGT TCT CAG CCT TG      |

**F: Forward; R: Reverse**

Abbreviations: GPX4, Glutathione Peroxidase 4; FPN, ferroportin; GAPDH: glyceraldehyde-3-phosphate dehydrogenase.

Supplemental figures and legends

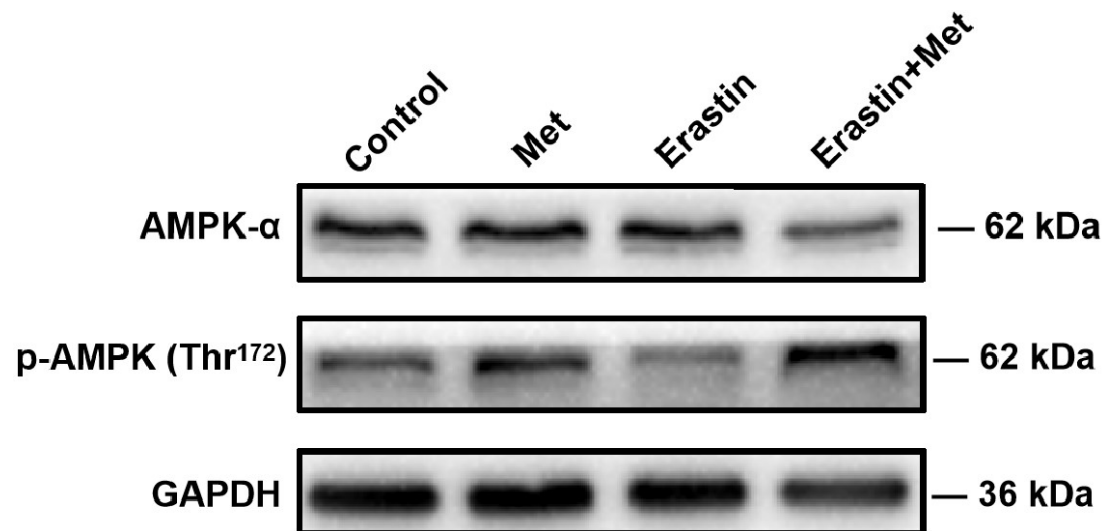

**Figure S1. The effect of metformin on AMPK $\alpha$ , P-AMPK $\alpha$  protein in erastin-treated WRL68 cells. Related to Figure 3**

Protein expressions of AMPK $\alpha$ , and P-AMPK $\alpha$  assessed by western blotting in WRL68 cells treated with erastin (20 $\mu$ M) in the absence or presence of metformin (2.5mM).

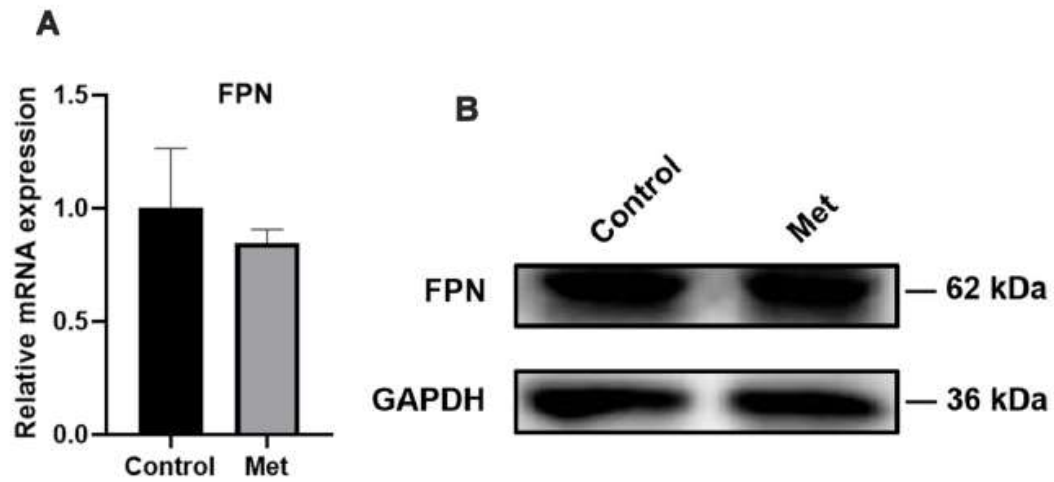

**Figure S2. The effect of metformin on FPN expression in WRL68 cells. Related to Figure 5**

(A) Effects of metformin on FPN mRNA expression in WRL68 cells. The data were expressed as mean  $\pm$  SEM (n=3 in each group). The comparisons between two groups were assessed by Student's t tests.

(B) Effects of metformin on FPN protein expression in WRL68 cells. The expression of FPN protein was assessed by western blotting, GAPDH was used as the loading control.

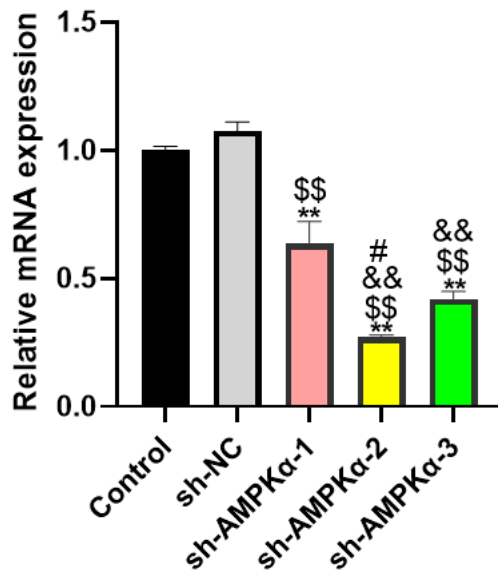

**Figure S3. Silencing efficiency of sh-AMPK $\alpha$  constructs in WRL68 cells. Related to Figure 5**

Short hairpin RNAs (shRNA) for transient silencing of AMPK $\alpha$  gene (sh-AMPK $\alpha$ ) or non-targeting control shRNA (sh-NC) were constructed. The silencing efficiency was determined by RT-PCR. All the data are presented as mean  $\pm$  SEM (n=3 in each group). Differences among groups were determined by one-way ANOVA analysis. \* $p$ <0.05, \*\* $p$ <0.01, vs. control group; \$ $p$ <0.05, \$\$ $p$ <0.01, vs. sh-NC group; & $p$ <0.05, && $p$ <0.01, vs. sh-AMPK $\alpha$ -1 group; # $p$ <0.05, ## $p$ < 0.01, vs. sh-AMPK $\alpha$ -3 group. The one with the highest silencing efficiency (sh-AMPK $\alpha$ -2) was selected for the experiment.
